# Supplementary material for: Tunable Electronic Properties of Few-Layer Tellurene under In-Plane and Out-of-Plane Uniaxial Strain
Source: MDPI journal article supplement (doi:10.3390/nano12050875), 2022-03-06
Supplement: s1 [file s1]

# Supplementary Materials

## Tunable Electronic Properties of Few-Layer Tellurene Under In-Plane and Out-of-plane Uniaxial Strain

Genwang Wang<sup>1,2</sup>, Ye Ding <sup>1,2</sup>, Yanchao Guan<sup>1,2</sup>, Yang Wang<sup>1,2</sup>, \*, and Lijun Yang<sup>1,2,\*</sup>

<sup>1</sup> Key Laboratory of Microsystems and Microstructures Manufacturing, Ministry of Education, Harbin Institute of Technology, Harbin 150001, China; nisker@163.com (G.W.); dy1992hit@hit.edu.cn (Y.D.); guanyanchao@163.com (Y.G.)

<sup>2</sup> School of Mechatronics Engineering, Harbin Institute of Technology, Harbin 150001, China

\* Correspondence: wyyh@hit.edu.cn (Y.W.); yljtj@hit.edu.cn (L.Y.)

**Table S1.** Elastic stiffness constants, minimal and maximal YM and PR of  $\alpha$ -Te and  $\beta$ -Te

| Phase    | Layer Number | $C_{11}$<br>(N/mm) | $C_{12}$<br>(N/mm) | $C_{22}$<br>(N/mm) | $C_{66}$<br>(N/mm) | $E_{min}$<br>(N/mm) | $E_{max}$<br>(N/mm) | $\nu_{min}$ | $\nu_{max}$ |
|----------|--------------|--------------------|--------------------|--------------------|--------------------|---------------------|---------------------|-------------|-------------|
| $\alpha$ | BL           | 24.8               | 26.1               | 3.7                | 10.1               | 23.7                | 25.6                | 0.14        | 0.18        |
|          | TL           | 46.4               | 32.2               | 9.4                | 17.8               | 30.3                | 44.0                | 0.14        | 0.29        |
|          | FL           | 65.7               | 41.9               | 14.8               | 26.0               | 38.6                | 62.9                | 0.11        | 0.35        |
| $\beta$  | ML           | 13.2               | 29.4               | 7.8                | 6.6                | 11.1                | 24.8                | 0.26        | 0.59        |
|          | BL           | 17.4               | 46.9               | 7.0                | 9.4                | 16.4                | 44.1                | 0.15        | 0.40        |
|          | TL           | 40.7               | 67.9               | 15.6               | 16.8               | 37.1                | 61.9                | 0.23        | 0.38        |
|          | FL           | 65.5               | 89.5               | 24.2               | 21.9               | 58.2                | 80.6                | 0.27        | 0.40        |

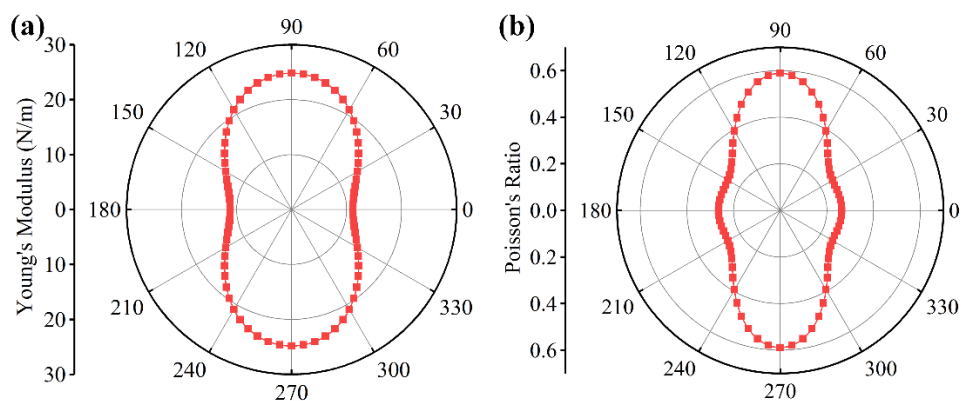

**Figure S1** Mechanical properties of ML  $\beta$ -Te. (a) Orientation-dependent Young's modulus (b) Orientation-dependent Poisson's ratio

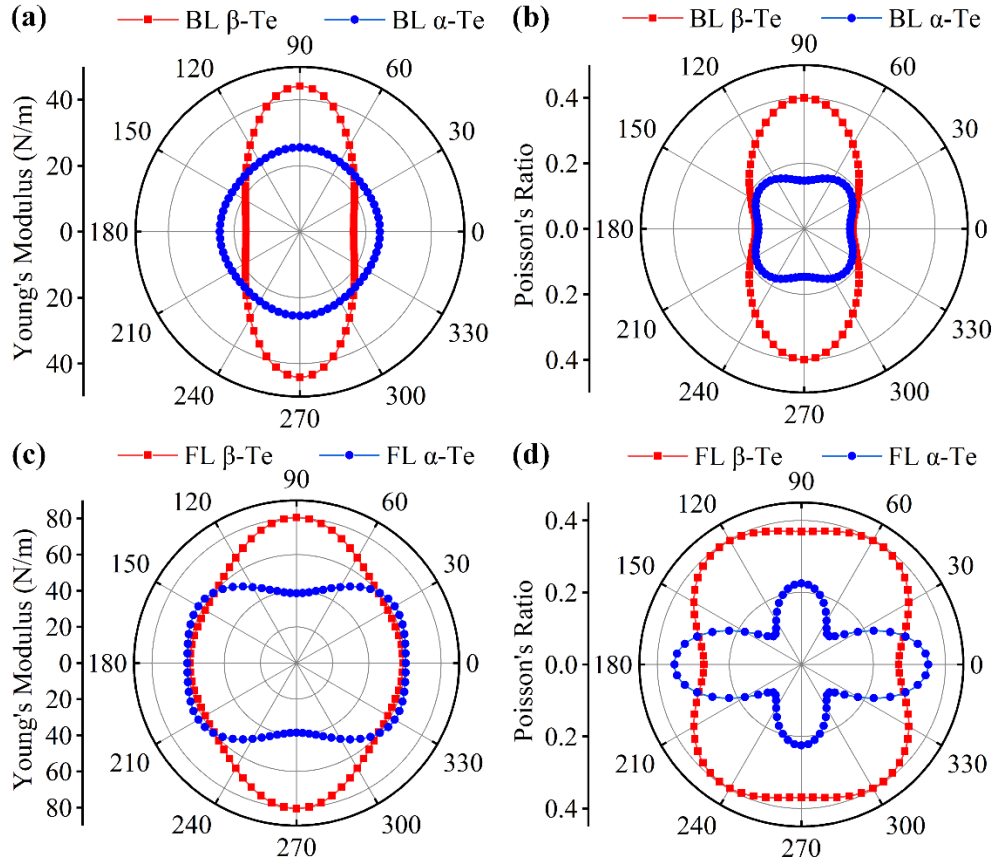

**Figure S2.** Mechanical properties of BL and FL tellurene. Orientation-dependent Young's modulus of BL (a) and FL (c) Te; Orientation-dependent Poisson's ratio of BL (b) and FL (d) Te.

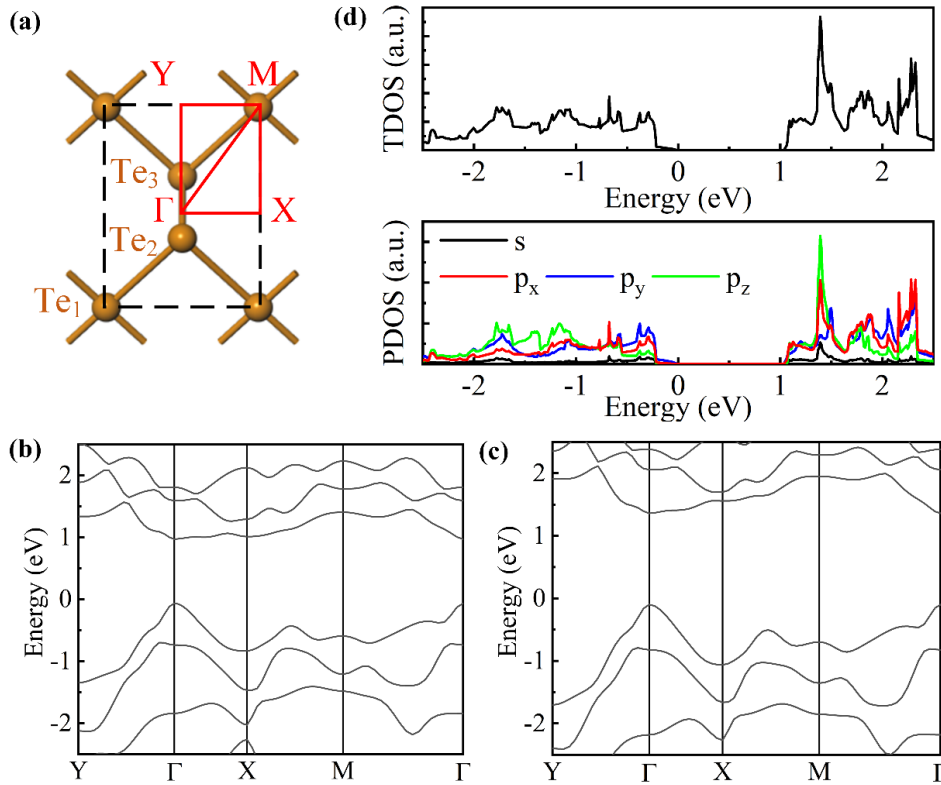

**Figure S3.** Band structures of ML  $\beta$ -Te. (a) Surface Brillouin zone; Band structures obtained within PBE+ SOC (b) and HSE + SOC schemes (c); (d) TDOS and PDOS;

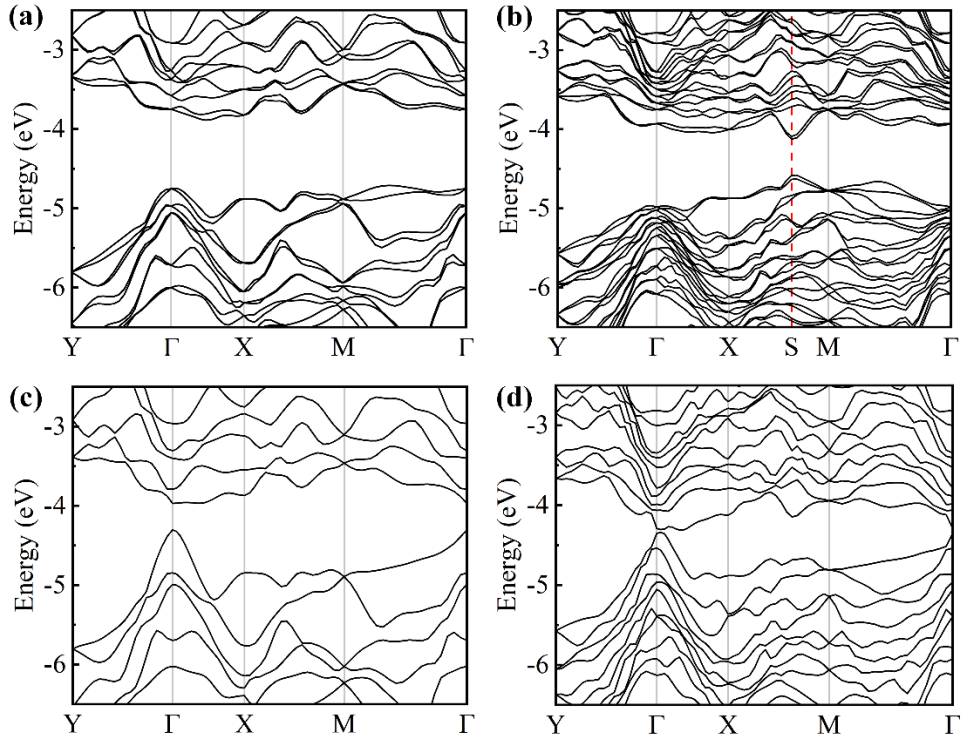

**Figure S4.** Band structures of BL and FL tellurene. (a) BL  $\alpha$ -Te; (b) BL  $\beta$ -Te; (c) FL  $\alpha$ -Te; (d) FL  $\beta$ -Te.

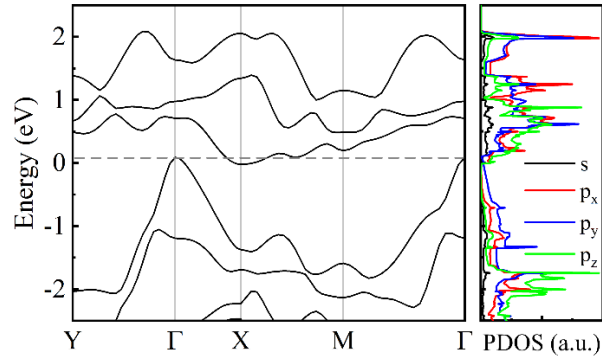

**Figure S5.** Band structures (left) and PDOSs (right) under the strains of -11% along the ZZ direction;

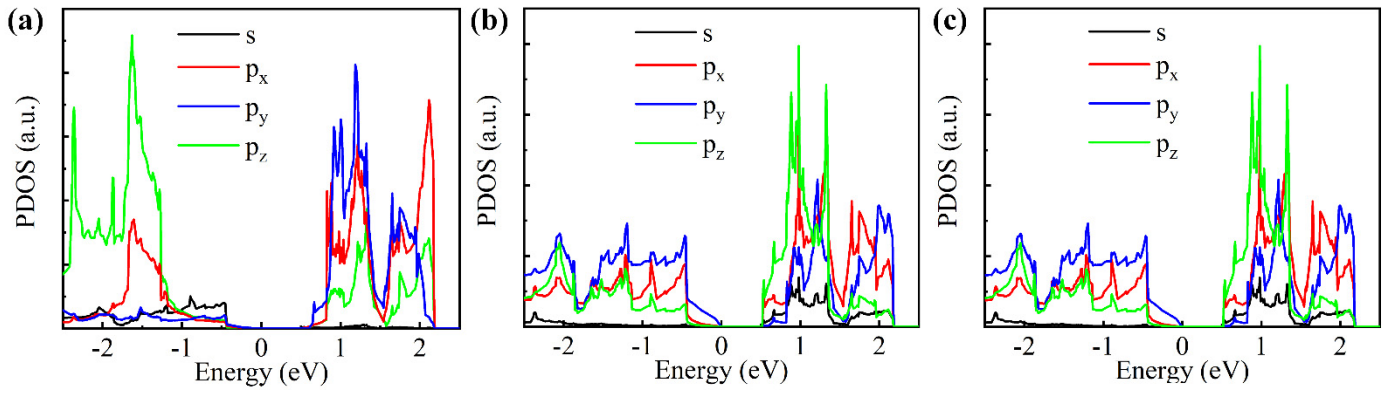

**Figure S6.** PDOS of Te atoms in ML  $\beta$ -Te. (a) Te<sub>1</sub>; (b) Te<sub>2</sub>; (c) Te<sub>3</sub>.

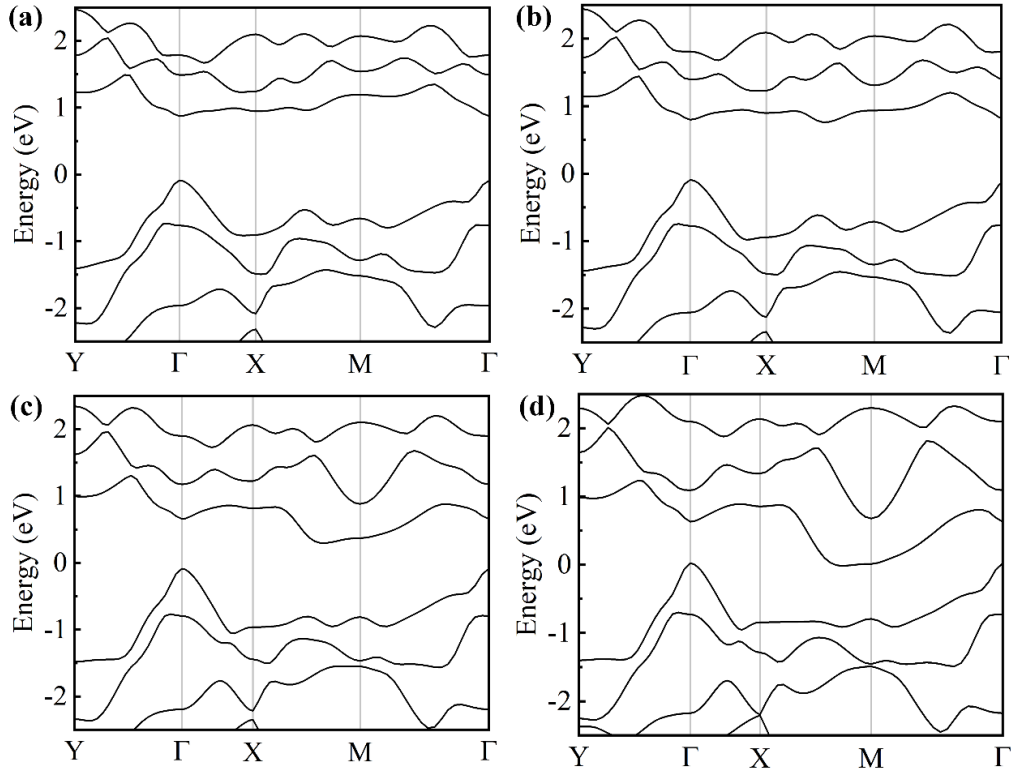

**Figure S7.** Band structures of ML  $\beta$ -Te under tensile strain along the AC direction. (a) 3%; (b) 6%; (c) 12%; (d) 17%.

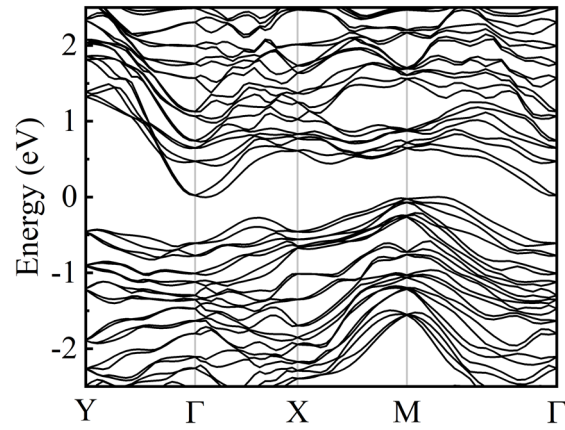

**Figure S8.** Band structure of FL  $\beta$ -Te under compressive strain of -21% along the NM direction.

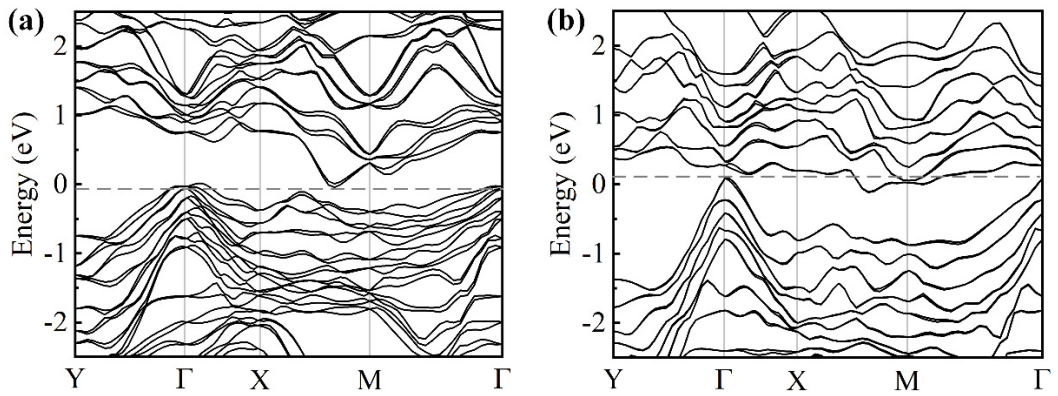

**Figure S9.** Band structures of metallic TL  $\alpha$ -Te induced by uniaxial strains. (a) tensile strains of 11% along AC direction; (b) compressive strains of -8% along ZZ direction.

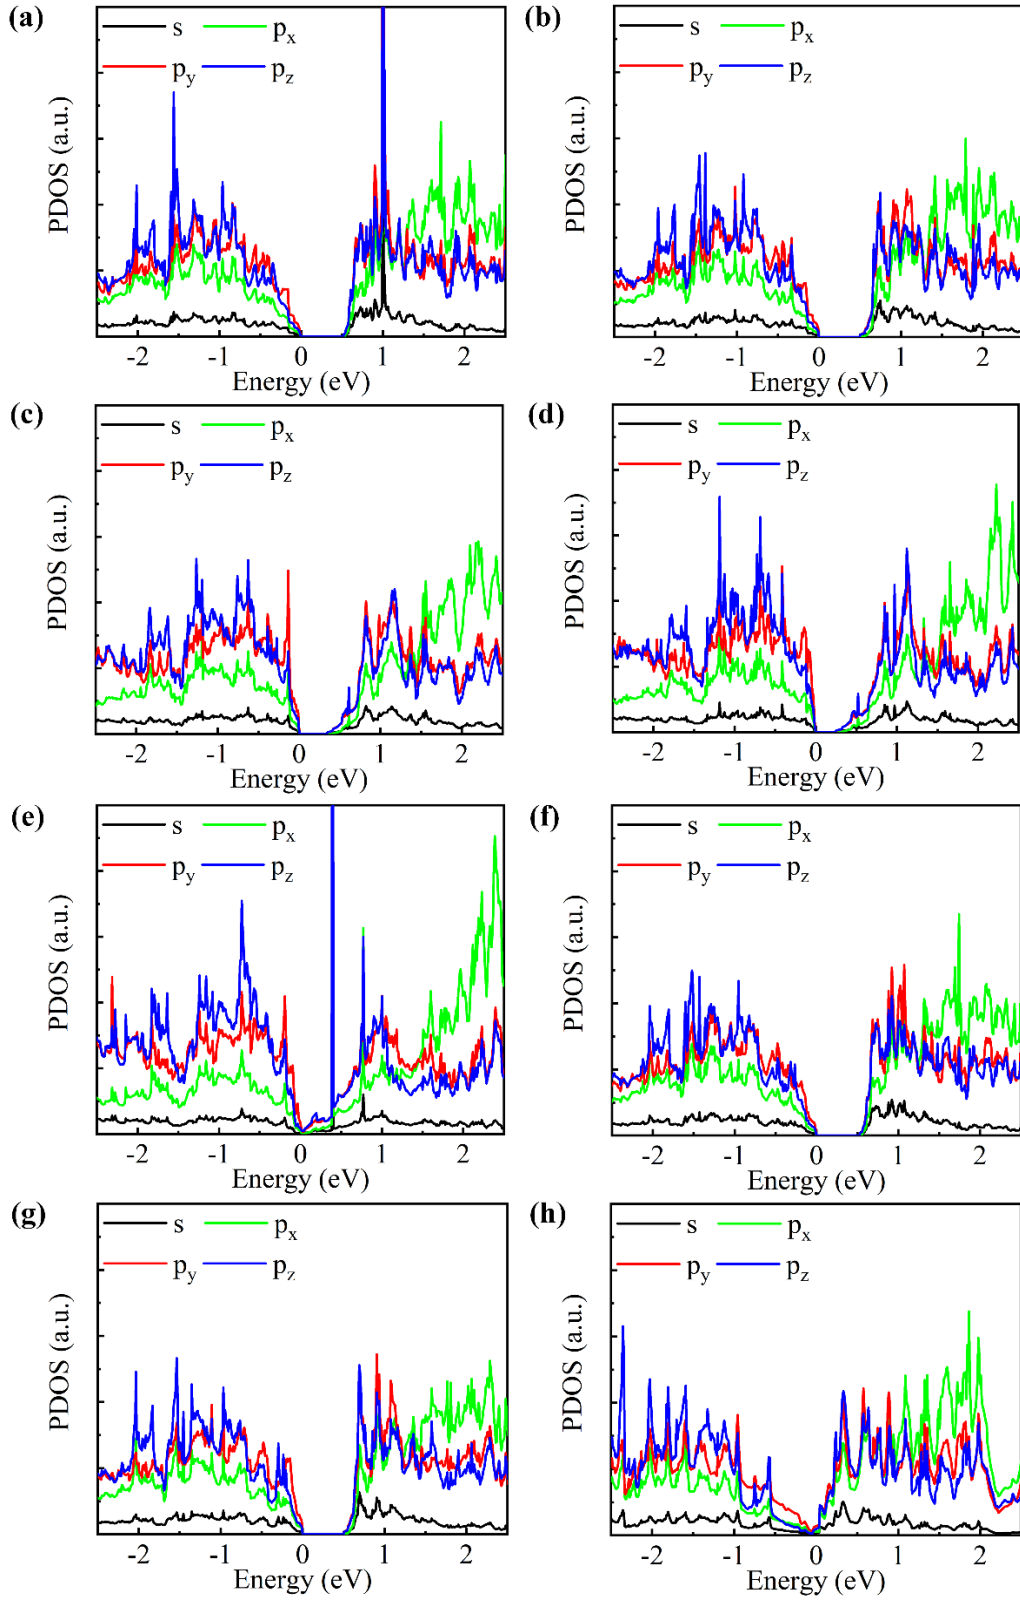

**Figure S10.** PDOS of TL  $\alpha$ -Te under uniaxial strain. (a)Unstrained; The tensile strains of 1%(b), 5%(c), 7% (d) and 11% (e) along the AC direction; The compress strains of -1%(f), -3%(g) and -8%(h) along the ZZ direction.

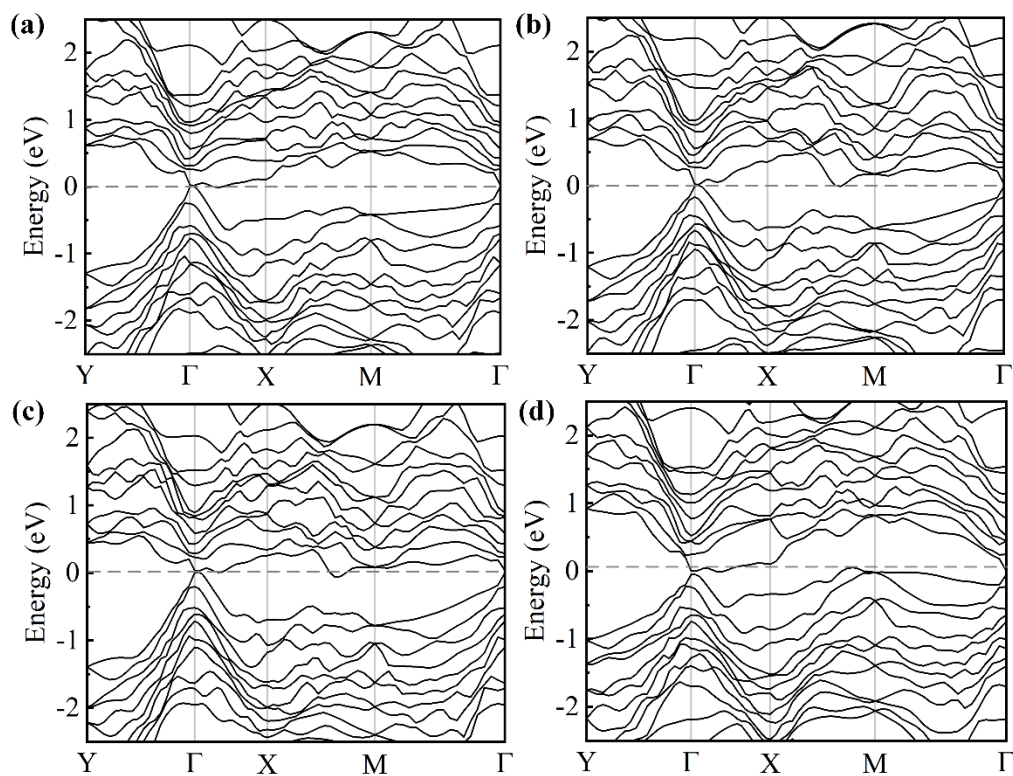

**Figure S11.** Band structures of metallic FL  $\beta$ -Te induced by uniaxial strain. The strain of -2% (a) and 3% (b) along the AC direction. The strain of -3%(c) and 5% (d) along the ZZ direction.

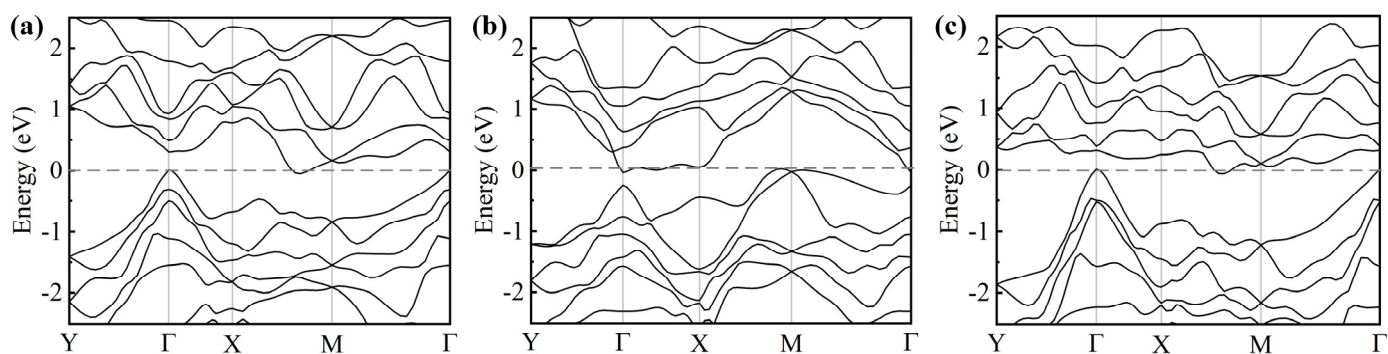

**Figure S12.** Band structures of metallic BL  $\beta$ -Te induced by uniaxial strain. (a) The tensile strains of 10% along the AC direction; (b) The tensile strains of 10% along the ZZ direction; (c) The compress strains of -7% along the ZZ direction.

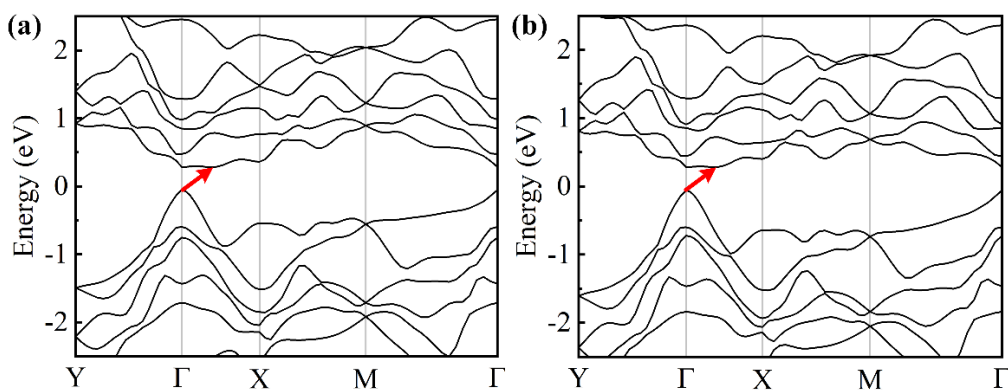

**Figure S13.** Band structure of BL  $\beta$ -Te under small uniaxial strain along the ZZ direction. (a) 1 %; (b) -1 %.

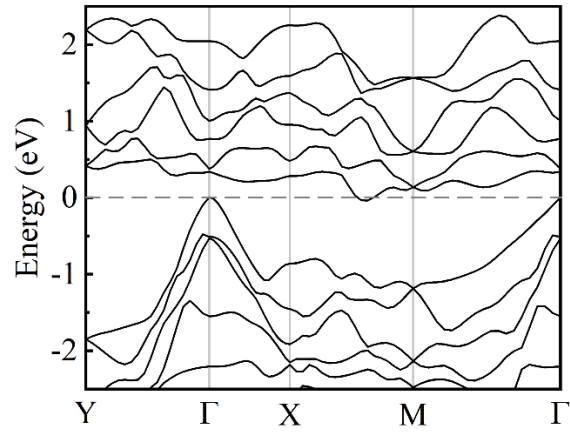

**Figure S14.** Band structure of BL  $\alpha$ -Te under compressive strain of -8% along the ZZ direction.

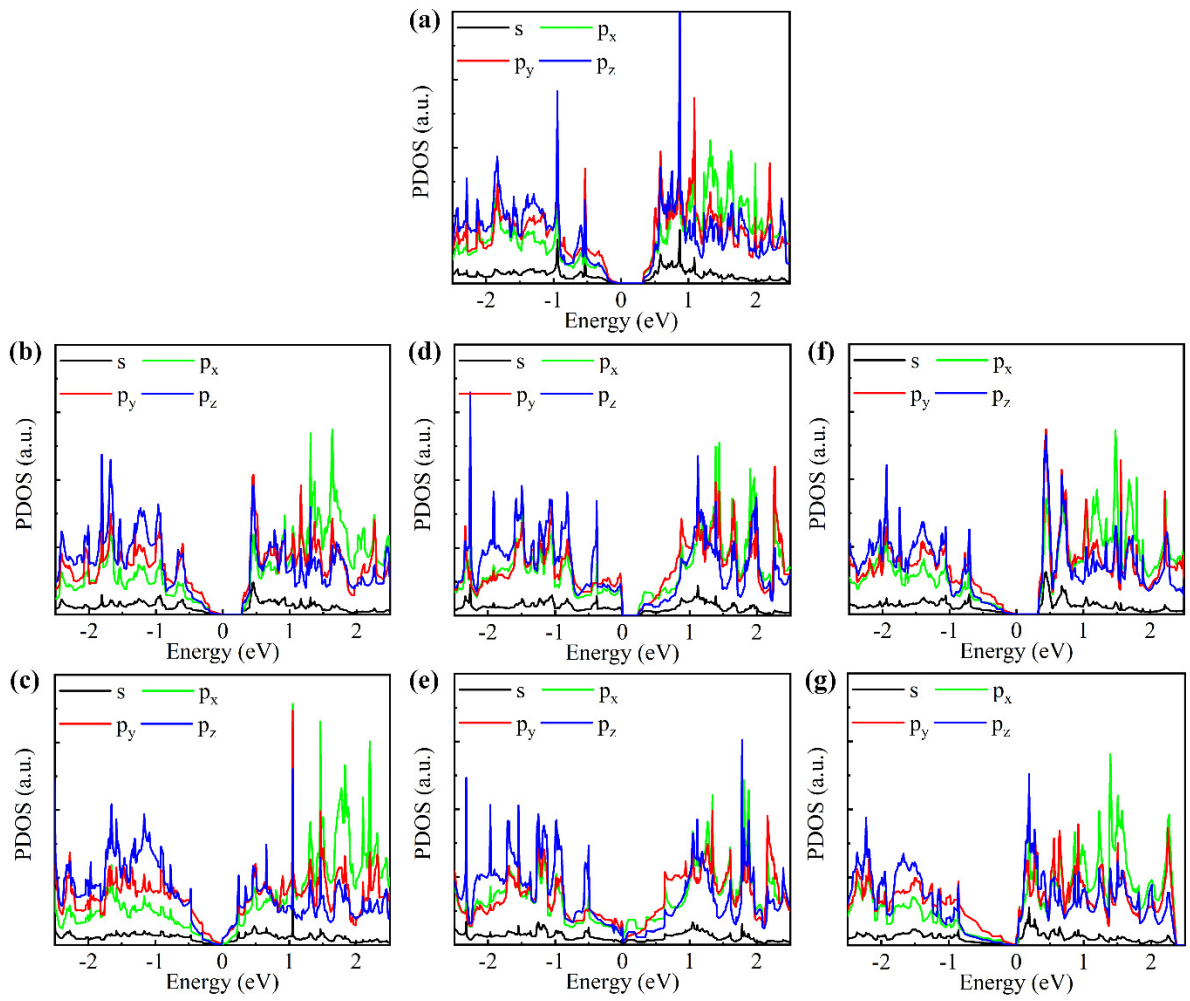

**Figure S15.** PDOSs of BL of  $\beta$ -Te under uniaxial strain. (a) Unstrained; The tensile strains of 5% (b) and 10% (c) along the AC direction; The tensile strains of 7% (d) and 10% (e) and the compress strains of -3% (f) and -7% (g) along the ZZ direction.

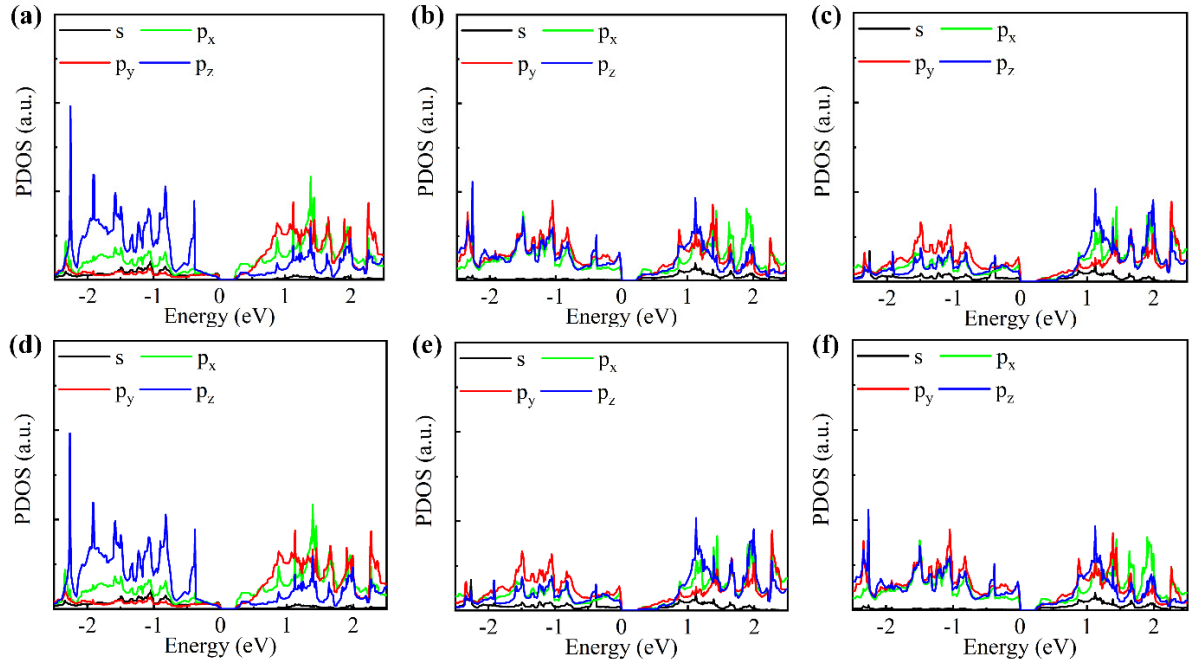

**Figure S16.** PDOS of Te atoms in BL  $\beta$ -Te under tensile strains of 7% along the ZZ direction. (a) Te<sub>1</sub>; (b) Te<sub>2</sub>; (c) Te<sub>3</sub>; (d) Te<sub>4</sub>; (e) Te<sub>5</sub>; (f) Te<sub>6</sub>.
